# Supplementary material for: A Simple System for Differentiation of Functional Intestinal Stem Cell-like Cells from Bone Marrow Mesenchymal Stem Cells
Source: PubMed Central journal article supplement — Mol Ther Nucleic Acids. 2018 Aug 24;13:110–20. doi: 10.1016/j.omtn.2018.08.017 (PMC6171535; doi:10.1016/j.omtn.2018.08.017), 2018-08-24
Supplement: mmc1.pdf [file mmc1.pdf]

**OMTN, Volume 13**

**Supplemental Information**

**A Simple System for Differentiation  
of Functional Intestinal Stem Cell-like Cells  
from Bone Marrow Mesenchymal Stem Cells**

**Lei Ye, Lei X. Sun, Min H. Wu, Jin Wang, Xin Ding, Hui Shi, Sheng L. Lu, Lin Wu, Juan Wei, Liang Li, and Yu F. Wang**

## Supplementary Information

### A simple system for differentiation of functional intestinal stem cell-like cells from bone marrow mesenchymal stem cells

L Ye<sup>1+</sup>, XL Sun<sup>2+</sup>, HM Wu<sup>1</sup>, J Wang<sup>2</sup>, X Ding<sup>2</sup>, H Shi<sup>1</sup>, LS Lu<sup>2</sup>, L Wu<sup>1</sup>, J Wei<sup>1</sup>, L Li<sup>2\*</sup>,  
FY Wang<sup>1\*</sup>

**Figure S1.** Systemic inflammatory response as reflected by plasma cytokine levels measured by ELISA. Data are shown as the mean±standard error of the mean; n=5, \* P<0.05, and \*\* P<0.01. INF- $\gamma$ , interferon gamma; IL, interleukin; TNF- $\alpha$ , tumournecrosis factor alpha.

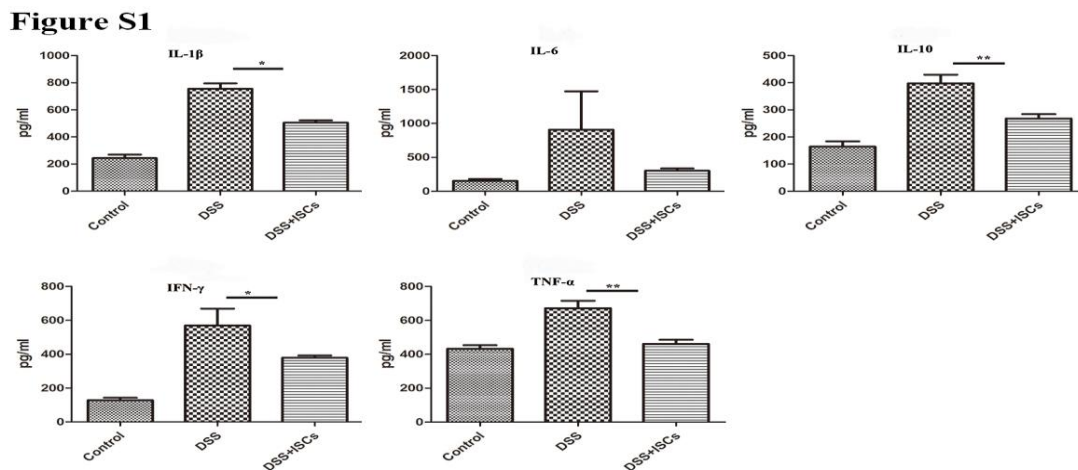

**Figure S2.** Seven days after transplantation, the colon swiss roll technique showed that the GFP<sup>+</sup> area was concentrated in the middle and lower parts of the colon. Nuclei were stained with DAPI. Scale bar: 12.5 $\mu$ m.

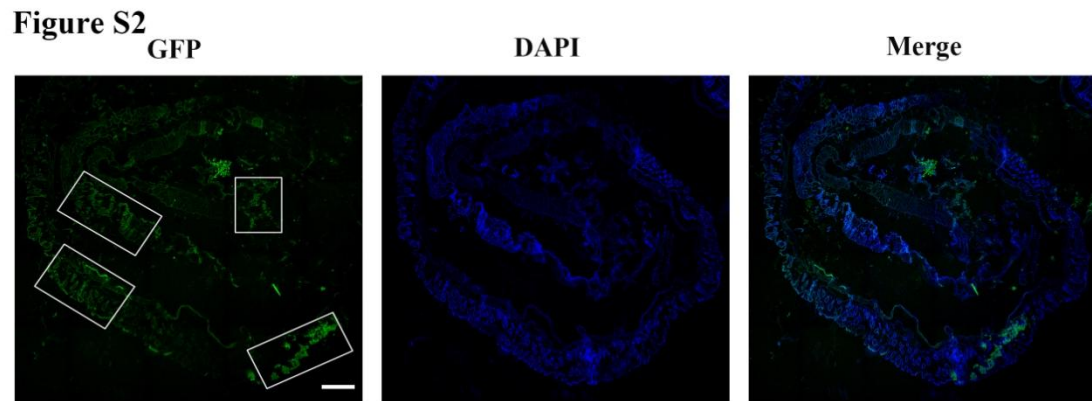

**Figure S3.** High-powered views of the GFP<sup>+</sup> cystic structures. Nuclei were stained with DAPI. Scale bar: 50 $\mu$ m.

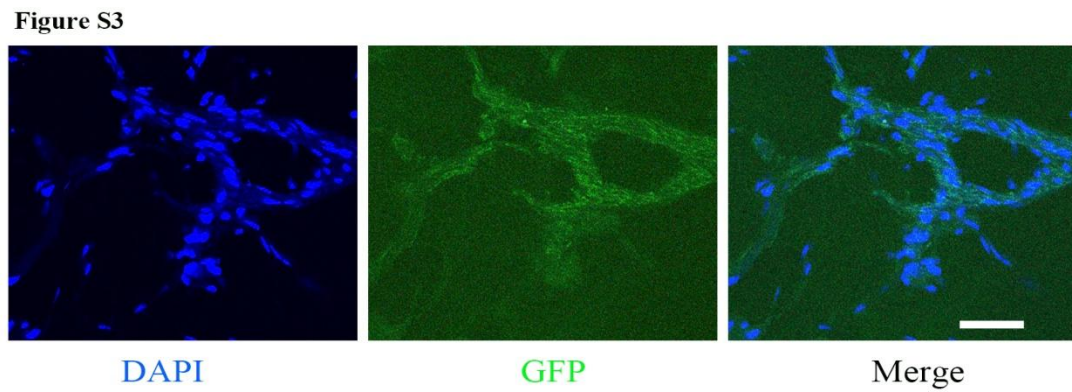

**Figure S4.** The migration process of the engrafted cells. Nuclei were stained with DAPI. Scale bar: 75 $\mu$ m.

Figure S4

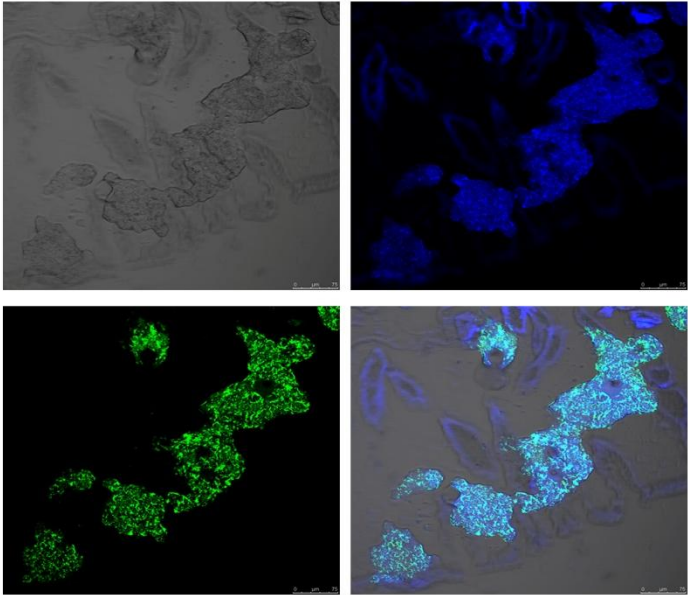

**Supplementary Table 1 Primers used in the study**

| Name               | Sequence 5'—3'           |
|--------------------|--------------------------|
| Sox17-F            | TCTGACGGTTGCCGATT        |
| Sox17-R            | CTGGACAGTGATGGTGGG       |
| Foxa2-F            | CAGTGGCGGAGGCAAGAAGAC    |
| Foxa2-R            | CTCAGCGCAGAGGCAGGTGTT    |
| Lgr5-F             | AATGCCATACGCTTACCA       |
| Lgr5-R             | TCTTCAAGGTCCCGCTCA       |
| Musashi-1-F        | TACAGCCATCCCTCTCACTG     |
| Musashi-1-R        | GCTGGGAGTAGAACCTGGAG     |
| (rat)GAPDH-F       | CCTGGAGAAACCTGCCAG       |
| (rat)GAPDH-R       | CACAGGAGACAACCTGGTCC     |
| WIF1-F             | TGGCATGGGAGACACTGCAA     |
| WIF1-R             | AGGCTGTGAACTCGGCGTAA     |
| E2F1-F             | CTCTGAAGCAAGGGCAGGGT     |
| E2F1-R             | ATCAGCCAAGGCCCTCACTC     |
| $\beta$ -catenin-F | TACCGAGCCTGCCATCTGTG     |
| $\beta$ -catenin-R | TTTGTGGGCAAAGGGCAAG      |
| ISX-F              | TACCCAGAGCTTGCCATTA      |
| ISX-R              | CATCCAGCCCTTAGTCA        |
| Villin 1-F         | AAAGCCAAGCAGTACCCACCTAG  |
| Villin 1-R         | CATCAAACCTTCACCTGTTCCACC |
| DDP4-F             | CGGAATAAATGACTGGG        |
| DDP4-R             | TTGCATGGGAATCGTAG        |
| IFN- $\gamma$ -F   | GGATGGTGACATGAAAATCCTGC  |
| IFN- $\gamma$ -R   | TGCTGATGGCCTGATTGTCTT    |
| IL-10-F            | GCTCTTACTGACTGGCATGAG    |
| IL-10-R            | CGCAGCTCTAGGAGCATGTG     |
| IL-6-F             | TAGTCCTTCTACCCCAATTTCC   |
| IL-6-R             | TTGGTCCTTAGCCACTCCTTC    |
| TNF-a-F            | CCCTCACACTCAGATCATCTTCT  |
| TNF-a-R            | GCTACGACGTGGGCTACAG      |
| (mouse)GAPDH-F     | AGGTCCGGTGTGAACGGATTTG   |
| (mouse)GAPDH-R     | TGTAGACCATGTAGTTGAGGTCA  |

**Supplementary Table 2 Primary antibodies used in the study****Primary antibodies for Western blot**

| Name                           | Company    | Catalog no. | Dilution |
|--------------------------------|------------|-------------|----------|
| Sox17                          | Abcam      | ab191699    | 1:1000   |
| Foxa2                          | CST        | 8186p       | 1:1000   |
| Lgr5                           | Abcam      | ab75850     | 1:1000   |
| Musashi-1                      | Novus      | NB100-1759  | 1:500    |
| WIF1                           | absin      | abs116623   | 1:1000   |
| E2F1                           | Abcam      | ab179445    | 1:1000   |
| $\beta$ -catenin               | CST        | 8480p       | 1:1000   |
| $\beta$ -catenin(phospho Y142) | Abcam      | ab27798     | 1:1000   |
| GAPDH                          | Santa Cruz | sc32233     | 1:2000   |

**Primary antibodies for immunofluorescence assay**

| Name       | Company | Catalog no. | Dilution |
|------------|---------|-------------|----------|
| Sox17      | Abcam   | ab191699    | 1:50     |
| Foxa2      | Abcam   | ab108396    | 1:100    |
| Lgr5       | absin   | abs106134   | 1:50     |
| Musashi-1  | Novus   | NB100-1759  | 1:20     |
| E-cadherin | Abcam   | ab40772     | 1:100    |
| MUC2       | Abcam   | ab76774     | 1:300    |
| CK-18      | Abcam   | ab133263    | 1:100    |
| Phalloidin | Yeasen  | 40735ES75   | 1:200    |
